# Supplementary material
Source: publisher figshare collection journal article supplement (https://gsapubs.figshare.com/articles/dataset/_/23118176)
Supplement: Supplementary file 1 [file 1]

Wang, N., Zhang, Z., Malusà, M.G., Chew, D., Wu, L., Xiang, D., and Xiao, W., 2023, Late Mesozoic impact of paleo-Pacific subduction on the North China craton revealed by apatite U-Pb and fission-track double dating and trace element analysis in the eastern Yanshan fold belt, northeastern Asia: GSA Bulletin, <https://doi.org/10.1130/B36751.1>.

## Supplemental Material

**Figure S1.** Outcrop photographs showing the main observed lithologies and facies of the sedimentary rocks in the western Liaoning province in eastern Yanshan fold belt, northeastern Asia.

**Figure S2.** Photomicrographs of the bedrock and sandstone samples in the eastern Yanshan fold belt, northeastern Asia.

**Figure S3.** The  $^{207}\text{Pb}$  corrected weighted mean  $^{206}\text{Pb}/^{238}\text{U}$  ages of sample Y2.

**Figure S4.** Part of the detrital apatite fission track radial plots, and the colour of single-grain AFT ages correspond to their AU-Pb ages.

**Figure S5.** Kernel density estimate of detrital apatite U-Pb ages using  $^{206}\text{Pb}/^{238}\text{U}$  ages corrected by  $^{204}\text{Pb}$  within 30% error.

**Figure S6.** Chondrite normalized  $(\text{La}/\text{Sm})_{\text{CN}}$  versus chondrite normalized  $(\text{La}/\text{Lu})_{\text{CN}}$  plot for samples Y1, 2, and 7.

**Figure S7.** Chondrite normalized rare earth element (REE) pattern using the single apatite grain for each sample.

**Figure S8.** AFT radial plots from sample Y12, Y8, and Y9, deconvolved based on their apatite U-Pb ages.

**Figure S9.** The overall weighted mean ( $^{207}\text{Pb}$  corrected)  $^{206}\text{Pb}/^{238}\text{U}$  ages of McClure apatite grains.

**Table S1.** Apatite U-Pb dating results of the eastern Yanshan fold belt, northeastern Asia.

**Table S2.** Apatite trace element analysis results of the eastern Yanshan fold belt, northeastern Asia.

**Table S3.** Apatite fission track analysis results of the eastern Yanshan fold belt, northeastern Asia.

**Table S4.** Key apatite trace element ratios and U-Pb age information of bedrocks of the eastern Yanshan fold belt, northeastern Asia.

**Table S5.** Published detrital zircon U-Pb age data of the eastern Yanshan fold belt, northeastern Asia.

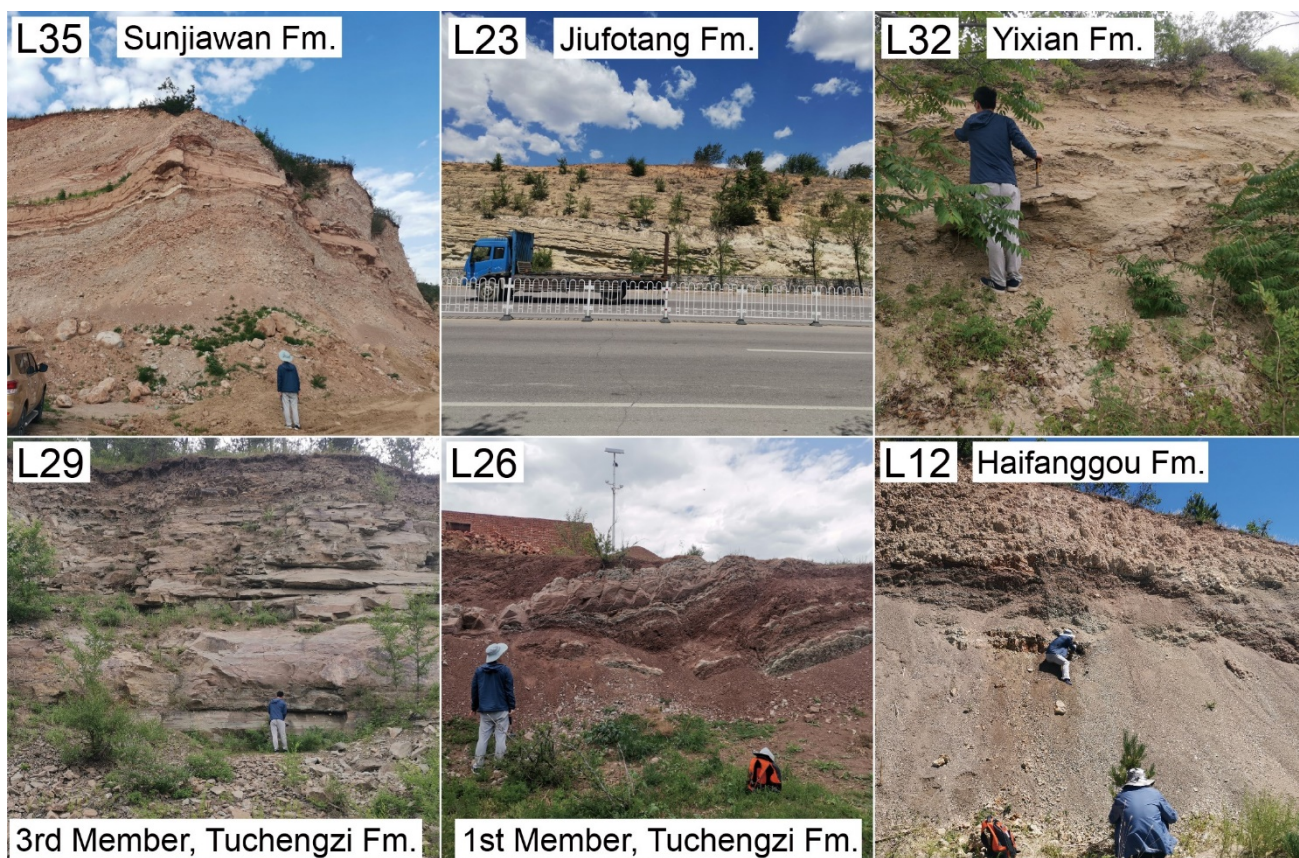

**Figure S1.** Outcrop photographs showing the main observed lithologies and facies of the sedimentary rocks in the western Liaoning province in eastern Yanshan fold belt, northeastern Asia.



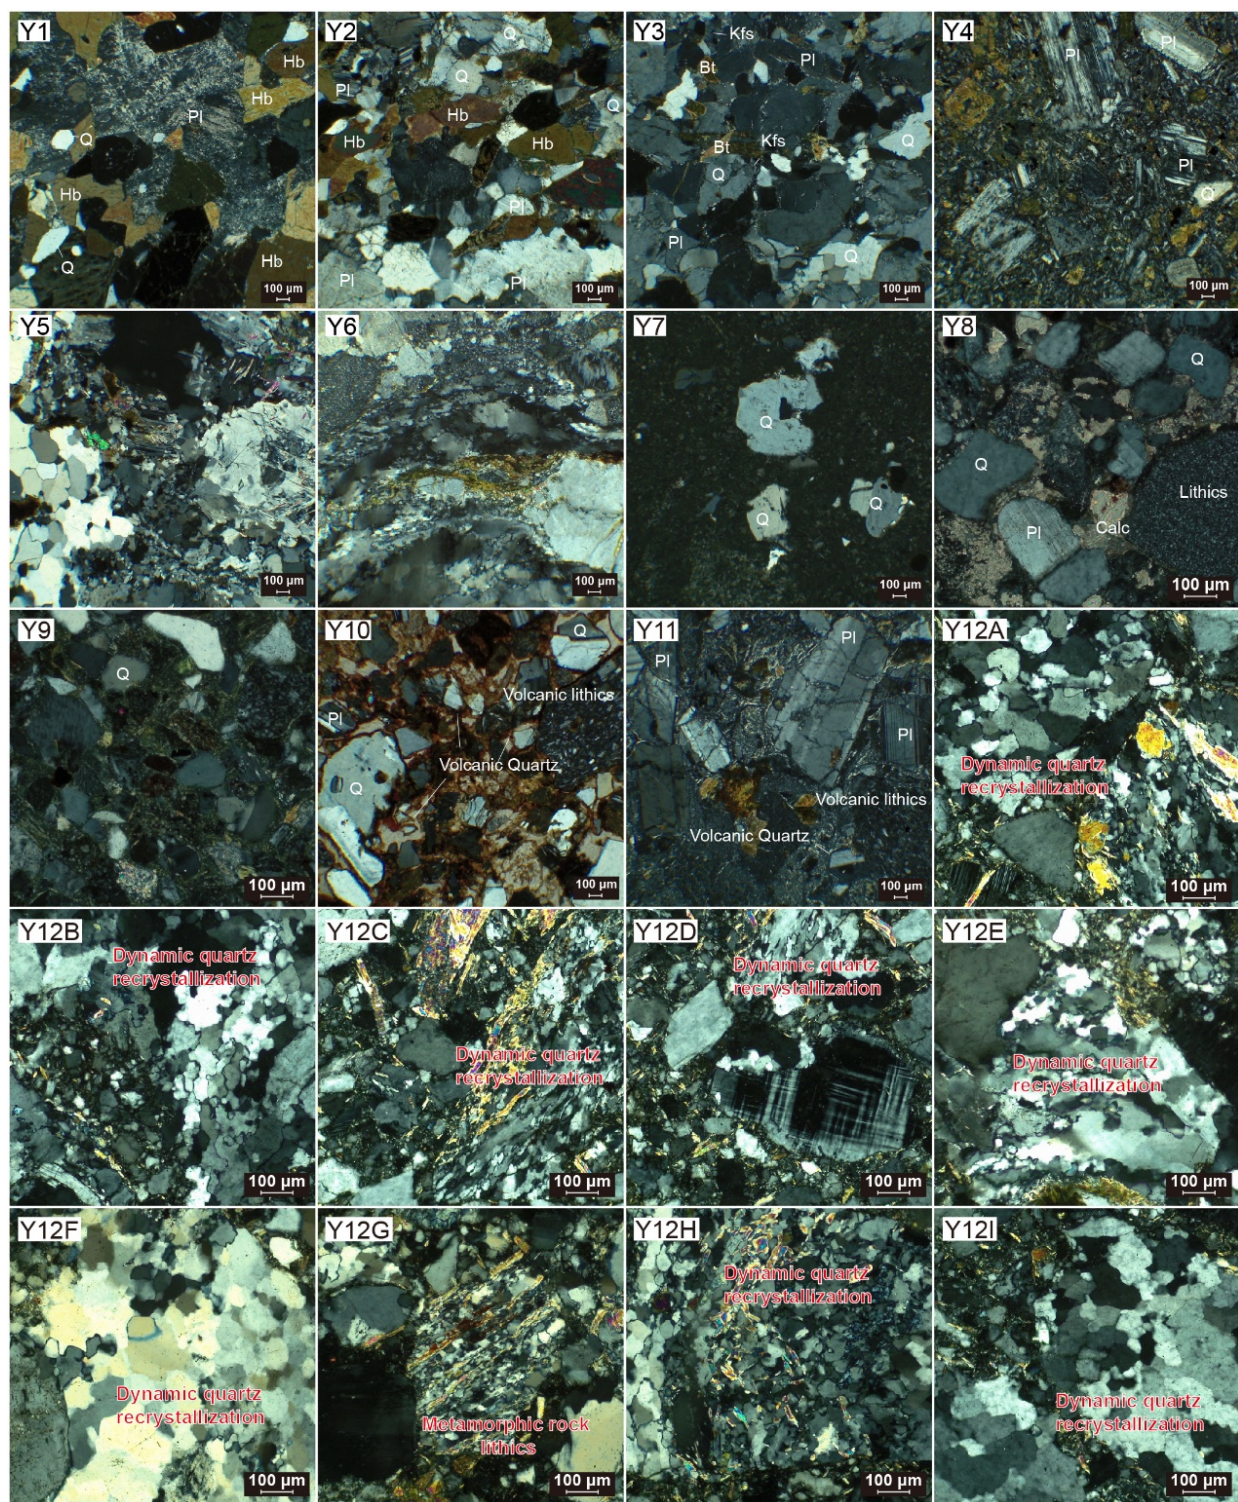

**Figure S2.** Photomicrographs of the bedrock and sandstone samples in the eastern Yanshan fold belt, northeastern Asia. Y1-Y6 are from the bedrock samples, and Y7-Y12 are from the sandstone samples.

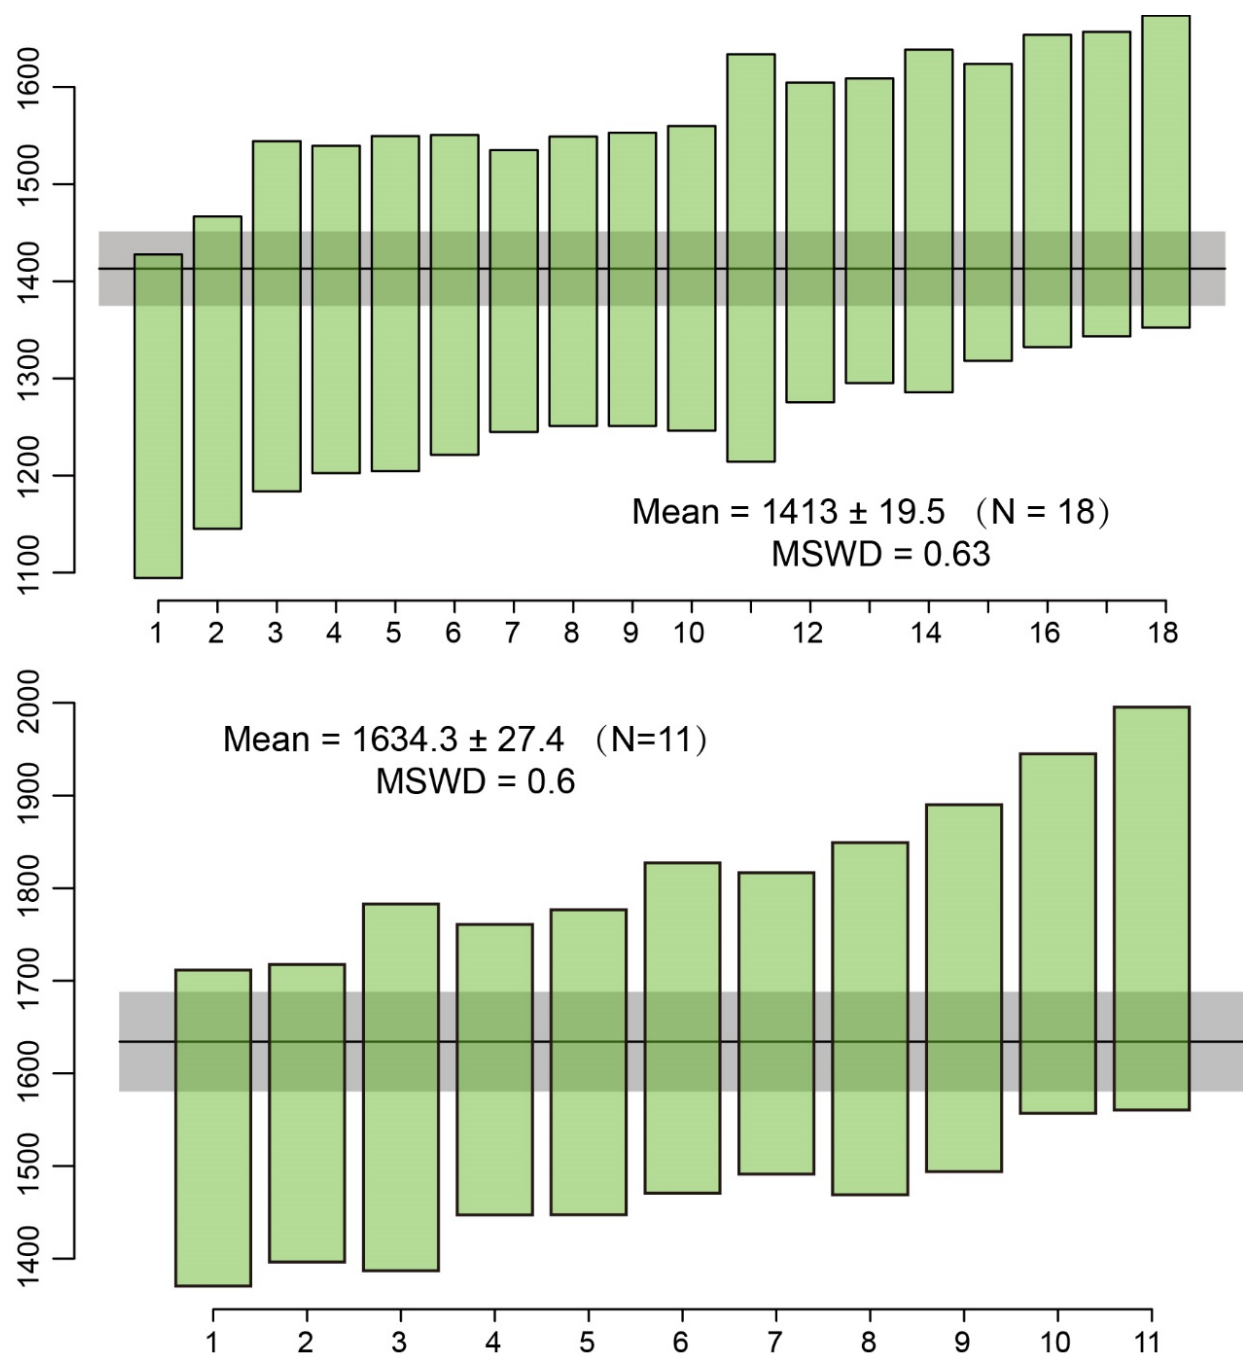

**Figure S3.** The  $^{207}\text{Pb}$  corrected weighted mean  $^{206}\text{Pb}/^{238}\text{U}$  ages of sample Y2.



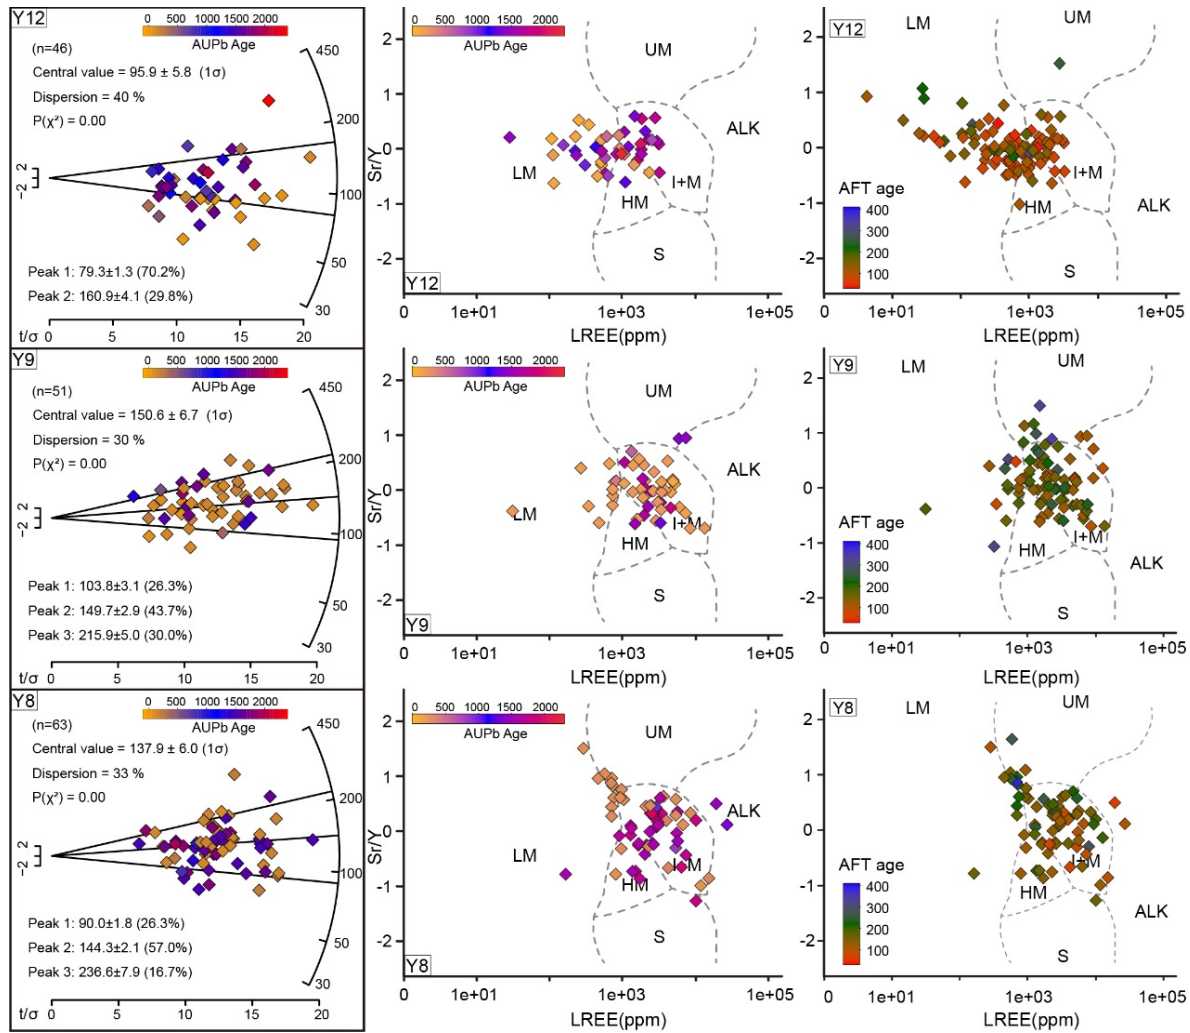

**Figure S4.** Part of the detrital apatite fission track radial plots, and the colour of single-grain AFT ages correspond to their AU-Pb ages. The black lines indicate statistically AFT population ages decomposed by Isoplot R (Vermeesch, 2018). Part of the support vector machine (SVM) apatite categorization scheme (Sr/Y vs LREE [La, Ce, Pr, Nd]) of the sedimentary rock samples are modified from (Chew et al., 2020), using the bedrock apatite database of O'Sullivan et al. (2018, 2020). Acronyms for groups on SVM biplots: ALK = alkali-rich igneous rocks; I + M = I-type granitoids and mafic igneous rocks; LM = low- and medium-grade metamorphic and metasomatic; HM = high-grade metamorphic; S = S-type granitoids; UM = ultramafic igneous. Grains from these samples are colored based on the AFT ages or AU-Pb ages.

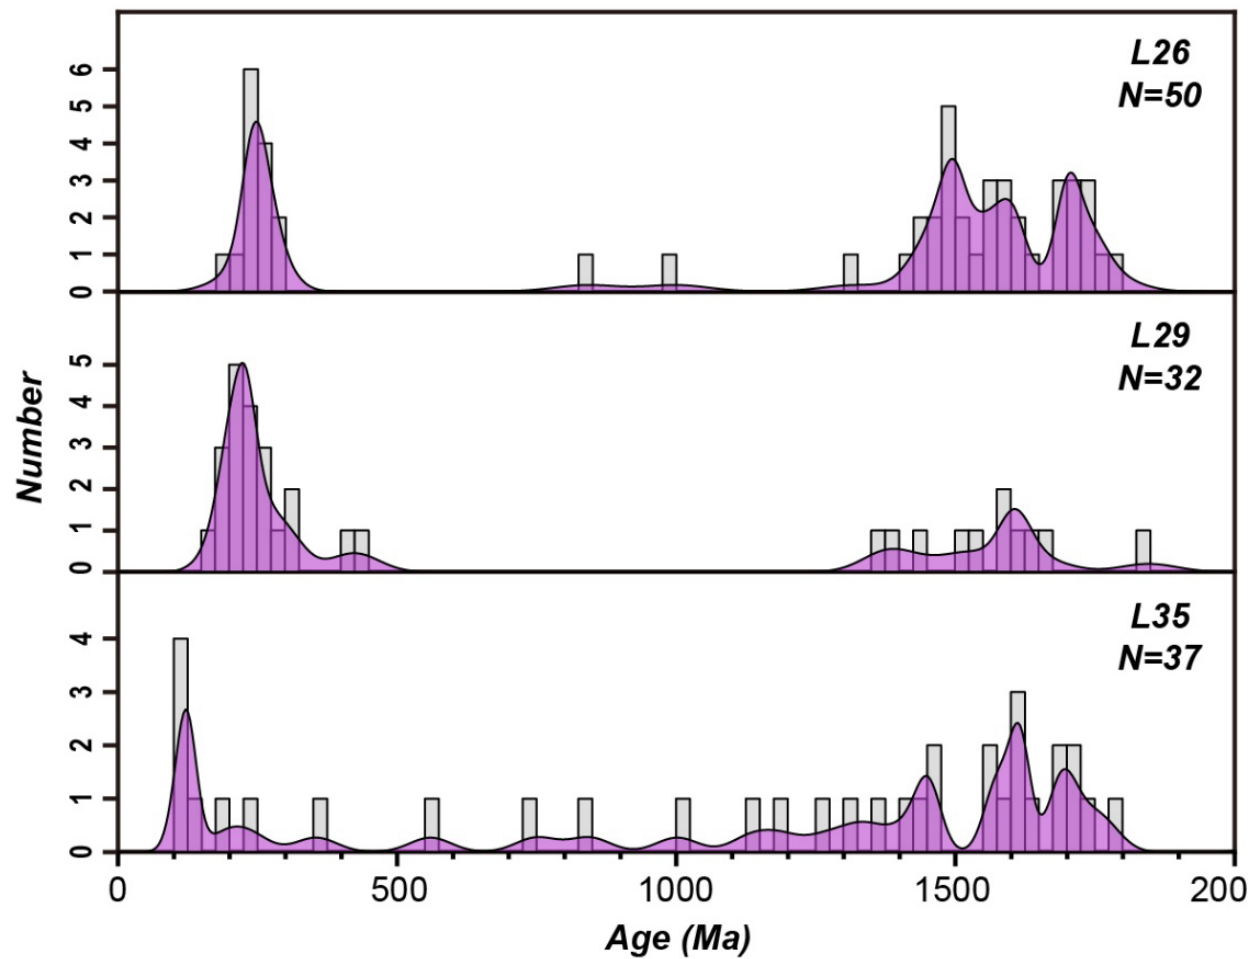

**Figure S5.** Kernel density estimate of detrital apatite U-Pb ages using  $^{206}\text{Pb}/^{238}\text{U}$  ages corrected by  $^{204}\text{Pb}$  within 30% error.

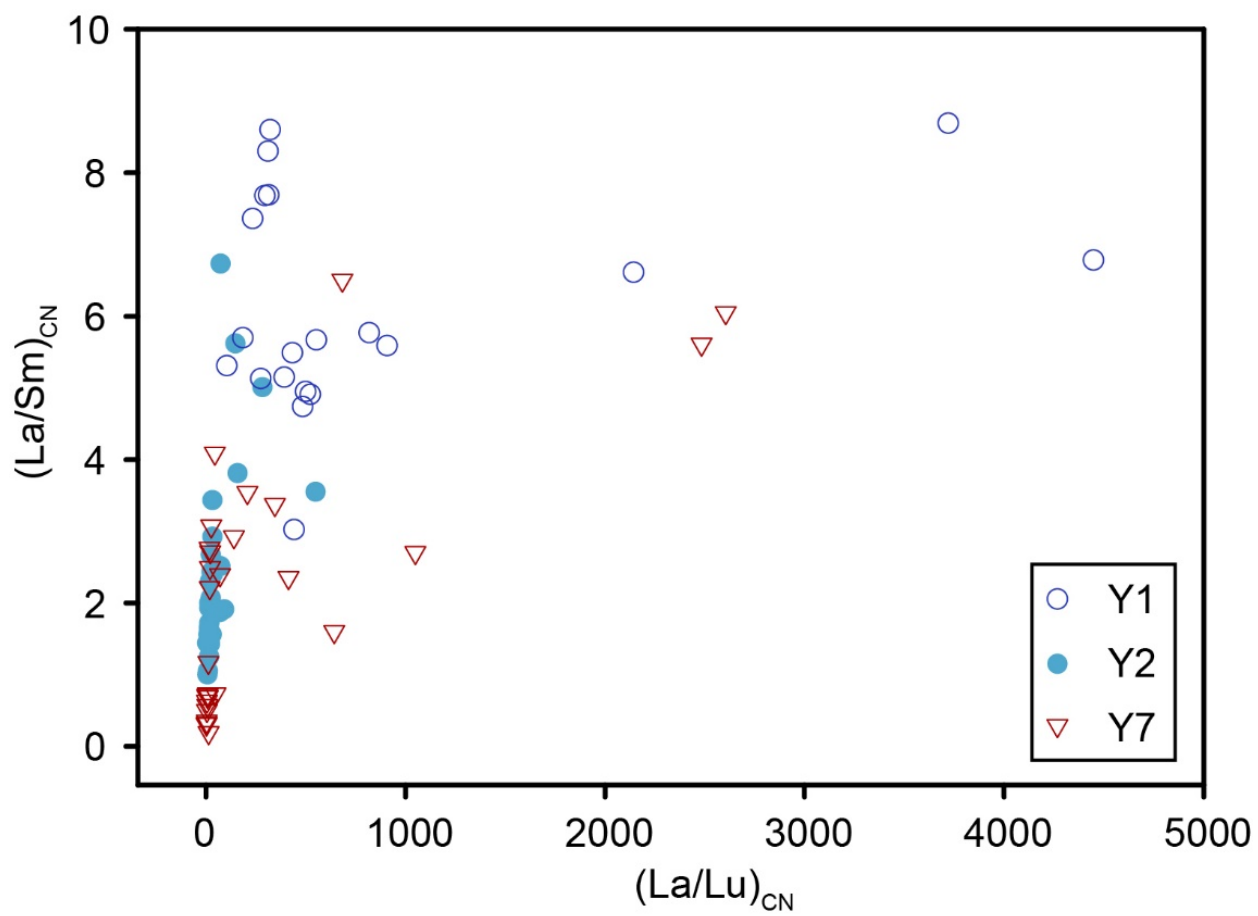

**Figure S6.** Chondrite normalized  $(\text{La}/\text{Sm})_{\text{CN}}$  versus chondrite normalized  $(\text{La}/\text{Lu})_{\text{CN}}$  plot for samples Y1, 2, and 7.

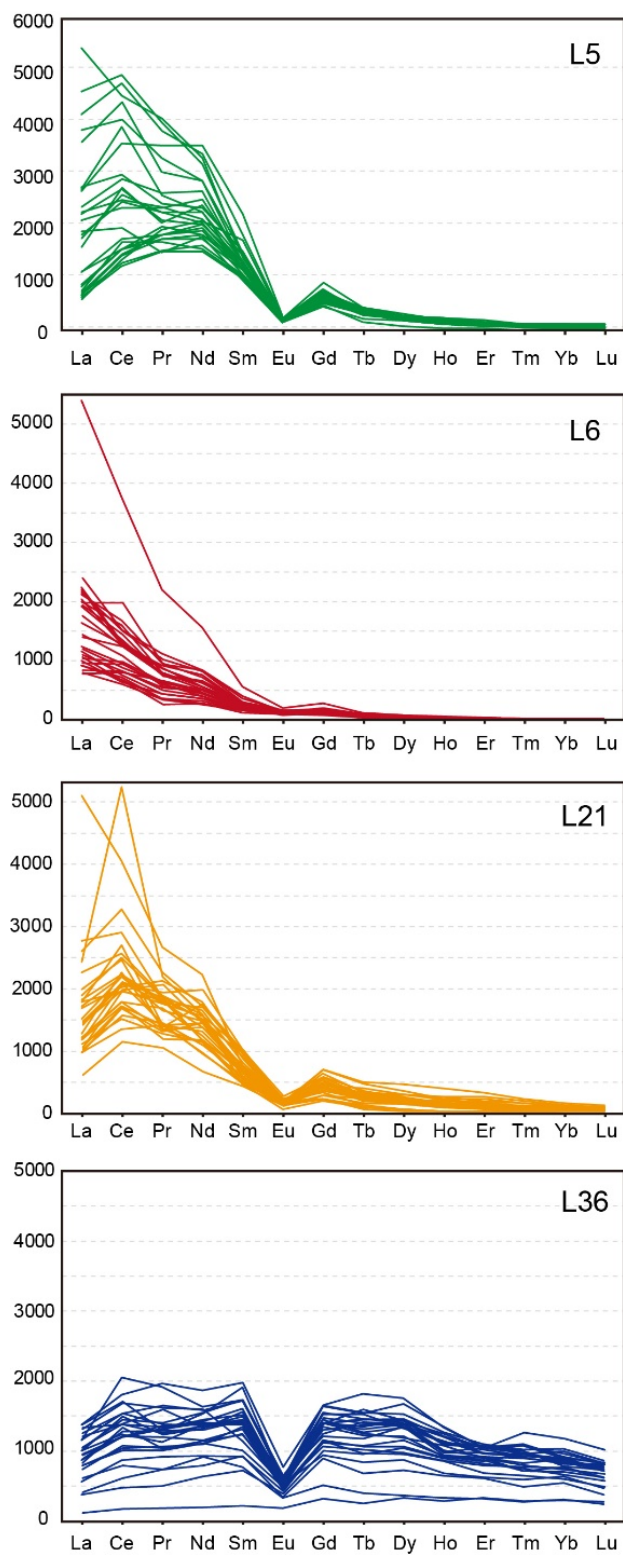

**Figure S7.** Chondrite normalized rare earth element (REE) pattern using the single apatite grain for each sample.



# **Sample Y12—Sunjiawan Formation**

## **~1.8-1.5 Ga AUPb age component**

Central age =  $112 \pm 15$  Ma (n=28)  
MSWD = 5.6,  $p(\chi^2) = 0$   
dispersion =  $0.3 \pm 0.1$

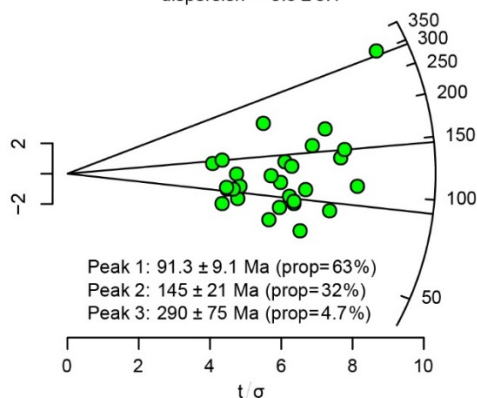

## **~138 Ma AUPb age component**

Central age =  $90 \pm 13$  Ma (n=12)  
MSWD = 3.9,  $p(\chi^2) = 1.1 \times 10^{-5}$   
dispersion =  $0.2 \pm 0.1$

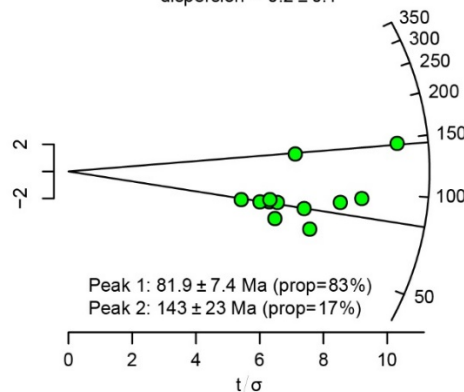

## **L26/Y8 1.6 Ga AUPb component**

central age =  $135.5 \pm 14.2$  (n=32)  
MSWD = 3.4,  $p(\chi^2) = 4.7 \times 10^{-10}$   
dispersion =  $0.242 \pm 0.090$

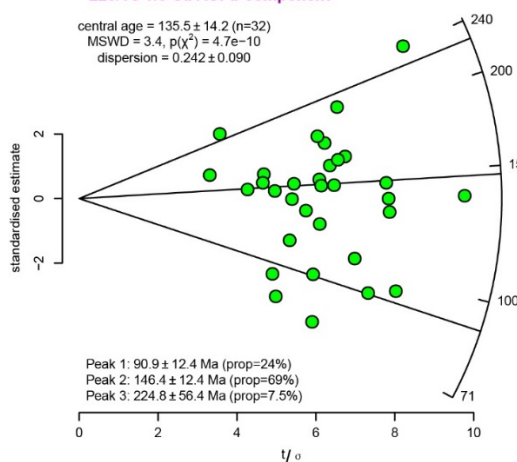

## **L26/Y8 250 Ma AUPb component**

central age =  $159.0 \pm 23.4$  (n=30)  
MSWD = 6.7,  $p(\chi^2) = 0$   
dispersion =  $0.36 \pm 0.12$

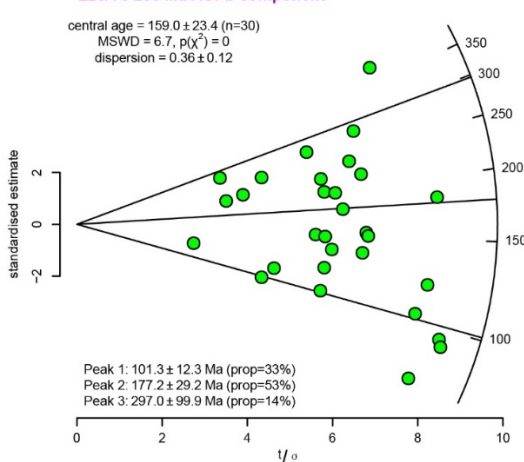

## **L29/Y9 1.7 Ga AUPb component**

central age =  $164.0 \pm 29.6$  (n=12)  
MSWD = 3.6,  $p(\chi^2) = 4.2 \times 10^{-5}$   
dispersion =  $0.25 \pm 0.16$

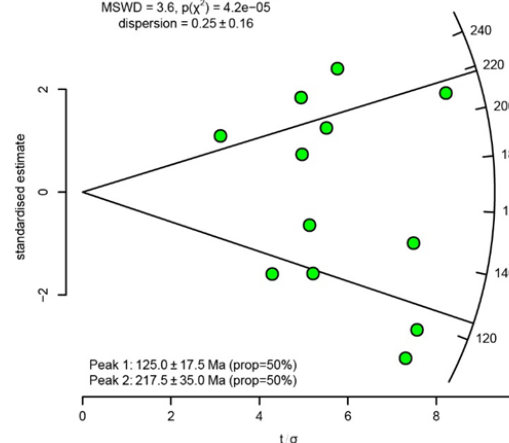

## **L29/Y9 250 Ma AUPb component**

central age =  $146.7 \pm 14.6$  (n=37)  
MSWD = 3.4,  $p(\chi^2) = 3.3 \times 10^{-11}$   
dispersion =  $0.251 \pm 0.084$

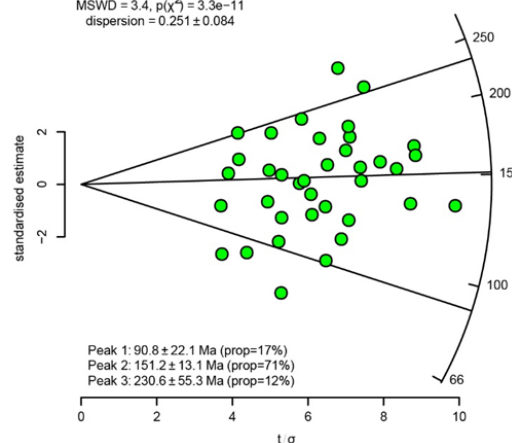

**Figure S8.** AFT radial plots from sample Y12, Y8, and Y9, deconvolved based on their apatite U-Pb ages.

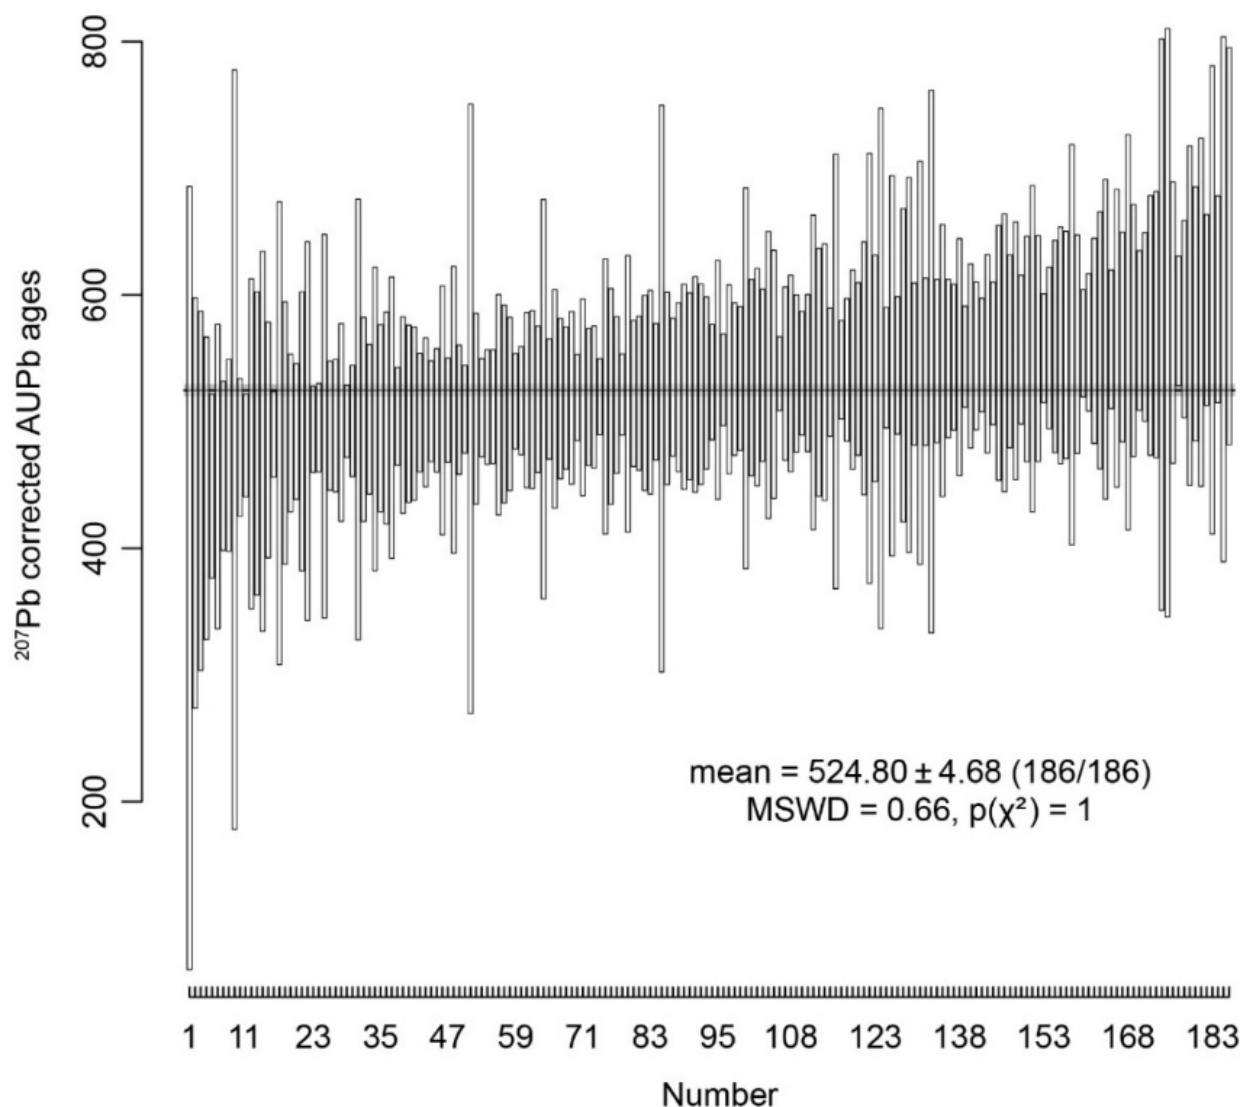

**Figure S9.** The overall weighted mean ( $^{207}\text{Pb}$  corrected)  $^{206}\text{Pb}/^{238}\text{U}$  ages of McClure apatite grains, as the secondary reference material of apatite U-Pb age determination (186 analyses).

## Reference

### Part 1: References related to ZHe, AFT, and AHe ages of granites and metamorphic zone in the North China Craton

- Chen, Z., 2019, Low-temperature Thermochronological Study on the Exhumation Process of Cretaceous Putos in Yanqing-Fengning Area of the Western Yanshan Belt Master's dissertation of China University of Geosciences.
- Feng, Q., Qiu, N., Chang, J., and Liu, N., 2018, Tectonothermal evolution of Fangshan Pluton: Constraints from (U-Th)/He ages: *Earth Science*, v. 43, no. 6, p. 1972-1982.

- Fu, L., Wei, J., Bagas, L., Pirajno, F., Zhao, X., Chen, J., Zhang, D., Chen, Y., and Chen, Y., 2020, Multistage exhumation of the Anjiayingzi gold deposit, northern North China Block: Geodynamic settings and exploration implications: *Ore Geology Reviews*, v. 116, p. 103220.
- Sun, J., Chen, W., Qin, K., Shen, Z., Zhao, S., Zhang, W., and Yin, J., 2022, Early Cretaceous Exhumation of the Southern Great Xing'an Range, Northeastern China: Evidence from (U-Th)/He and Fission-Track Thermochronology: *The Journal of Geology*, p. 000-000.
- Wu, L., Liu, Y., Wang, F., Zeng, L., Yang, L., Tian, Y., and Zhang, W., 2017, Cretaceous exhumation of Proterozoic Carbonatite on the Northern Margin of the North China Craton constrained by apatite fission-track and (U-Th)/He geochronology: *The Journal of Geology*, v. 125, no. 5, p. 593-606.
- Yue, H., 2019, Mesozoic-Cenozoic exhumation history of the central Yanshan belt: Constraints from low-temperature thermochronology Master's dissertation of China University of Geosciences.
- Zhai, J., Zhang, F., and Zhao, Y., 2003, Thermal history of the Fangshan granodiorite intrusion, Beijing: evidence from fission tracks of apatites and sphenes: *Geochimica*, v. 32, no. 2.
- Zhang, W., Zhao, S., Chen, W., Sun, J., Shen, Z., Du, Q., and Li, Z., 2022a, Early Cretaceous rapid exhumation processes in the southern Great Xing'an Range, NE China: implications for extensional geodynamics: *International Geology Review*, v. 64, no. 18, p. 2522-2543.
- Zhang, W., Zhao, S., Sun, J., Shen, Z., and Chen, W., 2022b, Late Mesozoic Tectono-Thermal History in the South Margin of Great Xing'an Range, NE China: Insights from Zircon and Apatite (U-Th)/He Ages: *Journal of Earth Science*, v. 33, no. 1, p. 36-44.

## **Part 2: References related to Ar-Ar ages of granites and metamorphic zone in the North China Craton**

- Lin, W., Faure, M., Chen, Y., Ji, W., Wang, F., Wu, L., Charles, N., Wang, J., and Wang, Q., 2013, Late Mesozoic compressional to extensional tectonics in the Yiwulüshan massif, NE China and its bearing on the evolution of the Yinshan–Yanshan orogenic belt: Part I: Structural analyses and geochronological constraints: *Gondwana Research*, v. 23, no. 1, p. 54-77.
- Sang, H., Wang, F., He, H., and Wang, Y., 2006, Intercalibration of the ZBH-15 biotite reference material utilized for K-Ar and  $^{40}\text{Ar}$ - $^{39}\text{Ar}$  isotopic dating in China: *Bulletin of Mineralogy Petrology and Geochemistry*, v. 25, no. 3.
- Wang, T., Guo, L., Zheng, Y., Donskaya, T., Gladkochub, D., Zeng, L., Li, J., Wang, Y., and Mazukabzov, A., 2012, Timing and processes of late Mesozoic mid-lower-crustal extension in continental NE Asia and implications for the tectonic setting of the destruction of the North China Craton: mainly constrained by zircon U-Pb ages from metamorphic core complexes: *Lithos*, v. 154, p. 315-345.
- Wu, L., Wang, F., Lin, W., Wang, Q., Yang, L., Shi, W., and Feng, H., 2014, Rapid cooling of the Yanshan



- Belt, northern China: constraints from  $^{40}\text{Ar}/^{39}\text{Ar}$  thermochronology and implications for cratonic lithospheric thinning: *Journal of Asian Earth Sciences*, v. 90, p. 107-126.
- Zhai, M., Zhu, R., Liu, J., Meng, Q., Hou, Q., Hu, S., Liu, W., Li, Z., Zhang, H., and Zhang, H., 2004, Time range of Mesozoic tectonic regime inversion in eastern North China Block: *Science in China Series D: Earth Sciences*, v. 47, no. 2, p. 151-159.
- Zhang, H.-F., and Sun, M., 2002, Geochemistry of Mesozoic basalts and mafic dikes, southeastern North China Craton, and tectonic implications: *International Geology Review*, v. 44, no. 4, p. 370-382.
- Zhu, G., Chen, Y., Jiang, D., and Lin, S., 2015, Rapid change from compression to extension in the North China Craton during the Early Cretaceous: evidence from the Yunmengshan metamorphic core complex: *Tectonophysics*, v. 656, p. 91-110.

### **Part 3: References related to Phanerozoic zircon U-Pb ages from the North China Craton**

- Cai, J.H., Yan, G.H., Mu, B.L., Reng, K.X., Song, B., Li, F.T., 2005. Zircon U-Pb age, Sr-Nd-Pb isotopic compositions and trace element of Fangshan complex in Beijing and their petrogenesis significance. *Acta Petrologica Sinica* 21, 776-788.
- Chang, S., Zhang, H., Renne, P.R., Fang, Y., 2009. High-precision  $^{40}\text{Ar}/^{39}\text{Ar}$  age constraints on the basal Lanqi Formation and its implications for the origin of angiosperm plants. *Earth and Planetary Science Letters* 279, 212-221.
- Chang, S., Zhang, H., Hemming, S.R., Mesko, G.T., Fang, Y., 2014.  $^{40}\text{Ar}/^{39}\text{Ar}$  age constraints on the Haifanggou and Lanqi formations: When did the first flowers bloom? *Geological Society, London, Special Publications* 378, 277-284.
- Chen, B., Tian, W., Zhai, M.G., Arakawa, Y., 2005. Zircon U-Pb geochronology and geochemistry of the Mesozoic magmatism in the Taihang Mountains and other places of the North China craton, with implications for petrogenesis and geodynamic setting. *Acta Petrologica Sinica* 21, 13-24.
- Chen, W., Ji, Q., Liu, D.Y., Zhang, Y., Song, B., Liu, X.Y., 2004. Isotope geochronology of the fossil-bearing beds in the Daohugou area, Ningcheng, Inner Mongolia. *Geological Bulletin of China* 23, 1165-1169.
- Chen, W., Zhang, Y., Ji, Q., Liu, D.Y., Song, B., Yao, P.Y., Liu, X.Y., 2005. Age of the valuable fossiliferous beds of the Shihetun village - New evidence of Ar/Ar and SHRIMP U/Pb dating. *Journal of Stratigraphy* 29, 582-588.
- Chu, Z., He, H., Ramezani, J., Bowring, S.A., Hu, D., Zhang, L., Zheng, S., Wang, X., Zhou, Z., Deng, C., Guo, J., 2016. High-precision U-Pb geochronology of the Jurassic Yanliao Biota from Jianchang (western Liaoning Province, China): Age constraints on the rise of feathered dinosaurs and eutherian mammals. *Geochemistry, Geophysics, Geosystems* 17, 3983-3992.

- Cope, T. D. (2003). Sedimentary evolution of the Yanshan fold-thrust belt, Northeast China: Stanford University California.
- Dai, J.Z., Mao, J.W., Zhao, C.S., Li, F.R., Wang, R.T., Xie, G.Q., Yang, F.Q., 2008. Zircon SHRIMP U-Pb age and petrogeochemical features of the Lanjiagou granite in western Liaoning province. *Acta Geologica Sinica* 82, 1555-1564.
- Dai, J., Mao, J., Zhao, C., Xie, G., Yang, F., Wang, Y., 2009. New U-Pb and Re-Os age data and the geodynamic setting of the Xiaojiayingzi Mo (Fe) deposit, western Liaoning province, Northeastern China. *Ore Geology Reviews* 35, 235-244.
- Davis, G.A., Zheng, Y.D., Wang, C., Darby, B.J., Zhang, C.H., Gehrels, G., 2001. Mesozoic tectonic evolution of the Yanshan fold and thrust belt, with emphasis on Hebei and Liaoning provinces, northern China. *Geological Society of America Memoirs* 194, 171-197.
- Dong, P., Dong, G., Santosh, M., Sun, Z., Li, H., Wang, S., Wang, W., 2020. Early cretaceous igneous activities in the north flank of the North China Craton: the Shouwangfen complex example. *International Geology Review* 62(6), 714-739.
- Dong, P.S., Dong, G.C., Sun, Z.R., Li, H.W., Wang, S.S., Zhai, T.L., Wang, W.Q., Geng, J.Z., 2018. Zircon U-Pb chronology, Hf isotopic compositions, geochemistry characteristics and geological significance of Shouwangfen complex in Yanshan region. *Earth Science Frontiers* 25, 264-276.
- Feng, G.Y., Liu, S., Feng, C.X., Yang, Y.H., Yang, C.G., Tang, L., Yang, J.S., 2015. U-Pb zircon geochronology, geochemistry and geodynamic significance of basaltic trachyandesites and trachyandesites from the Jianchang area, western Liaoning Province, China. *Journal of Asian Earth Sciences* 110, 141-150.
- Feng, Y.Z., Yang, J.H., Sun, J.F., Zhang, J.H., 2020. Material records for Mesozoic destruction of the North China Craton by subduction of the Paleo-Pacific slab. *Science China Earth Sciences* 63(5), 690-700.
- Fu, L., Wei, J., Kusky, T.M., Chen, H., Tan, J., Li, Y., Shi, W., Chen, C., Zhao, S., 2012. The Cretaceous Duimiangou adakite-like intrusion from the Chifeng region, northern North China Craton: Crustal contamination of basaltic magma in an intracontinental extensional environment. *Lithos* 134-135, 273-288.
- Fu, L., Wei, J., Chen, H., Bagas, L., Tan, J., Li, H., Zhang, D., Tian, N., 2016. The relationship between gold mineralization, exhumation of metamorphic core complex and magma cooling: Formation of the Anjiayingzi Au deposit, northern North China Craton. *Ore Geology Reviews* 73, 222-240.
- Gao, S., Rudnick, R.L., Yuan, H.L., Liu, X.M., Liu, Y.S., Xu, W.L., Ling, W.L., Ayers, J., Wang, X.C., Wang, Q.H., 2004. Recycling lower continental crust in the North China craton. *Nature* 432, 892-897.

- Gao, S., Rudnick, R.L., Xu, W.L., Yuan, H.L., Liu, Y.S., Walker, R.J., Puchtel, I.S., Liu, X.M., Huang, H., Wang, X.R., Yang, J., 2008. Recycling deep cratonic lithosphere and generation of intraplate magmatism in the North China Craton. *Earth and Planetary Science Letters* 270, 41-53.
- He, H.Y., Wang, X.L., Zhou, Z.H., Zhu, R.X., Jin, F., Wang, F., Ding, X., Boven, A., 2004.  $^{40}\text{Ar}/^{39}\text{Ar}$  dating of ignimbrite from Inner Mongolia, northeastern China, indicates a post-Middle Jurassic age for the overlying Daohugou Bed. *Geophysical Research Letters* 31, L20609, doi:10.1029/2004GL020792.
- He, H.Y., Wang, X.L., Zhou, Z.H., Jin, F., Wang, F., Yang, L.K., Ding, X., Boven, A., Zhu, R.X., 2006.  $^{40}\text{Ar}/^{39}\text{Ar}$  dating of Lujiatun bed (Jehol Group) in Liaoning, northeastern China. *Geophysical Research Letters* 33, L04303, doi: 10.1029/2005GL025274.
- Hong, L.B., Zhang, Y.H., Xu, Y.G., Ren, Z.Y., Yan, W., Ma, Q., Ma, L., Xie, W., 2017. Hydrous orthopyroxene-rich pyroxenite source of the Xinkailing high magnesium andesites, Western Liaoning: Implications for the subduction-modified lithospheric mantle and the destruction mechanism of the North China Craton. *Lithos* 282-283, 10-22.
- Huang, H., Gao, S., Hu, Z.C., Liu, X.M., Yuan, H.L., 2007. Geochemistry of the high-Mg andesites at Zhangwu, western Liaoning: Implication for delamination of newly formed lower crust. *Science in China Series D - Earth Sciences* 50, 1773-1786.
- Ji, M., Liu, J.L., Hu, L., Guan, H.M., Davis, G., Zhang, W., 2009. Zircon SHRIMP U-Pb age of Yinmawanshan and Zhaofang pluton in South Liaoning metamorphic core complex and its geological implications. *Acta Petrologica Sinica* 25, 173-181.
- Jiang, N., Liu, Y.S., Zhou, W.G., Yang, J.H., Zhang, S.Q., 2007. Derivation of Mesozoic adakitic magmas from ancient lower crust in the North China craton. *Geochimica et Cosmochimica Acta* 71, 2591-2608.
- Jiang, N., Zhang, S.Q., Zhou, W.G., Liu, Y.S., 2009. Origin of a Mesozoic granite with A-type characteristics from the North China craton: highly fractionated from I-type magmas? *Contributions to Mineralogy and Petrology* 158, 113-130.
- Jiang, N., Carlson, R.W., Guo, J.H., 2011. Source of Mesozoic intermediate-felsic igneous rocks in the North China craton: Granulite xenolith evidence. *Lithos* 125, 335-346.
- Jiang, Y.H., Jiang, S.Y., Zhao, K.D., Ni, P., Ling, H.F., Liu, D.Y., 2005. SHRIMP U-Pb zircon dating for lamprophyre from Liaodong Peninsula: Constraints on the initial time of Mesozoic lithosphere thinning beneath eastern China. *Chinese Science Bulletin* 50, 2612-2620.
- Jiao, S.T., Yan, D.P., Zhang, Q., Li, C.D., Wan, B., Tian, Z.H., 2013. Zircon U-Pb age, geochemistry characteristics of Badaling granitoid complex and their geological significance. *Acta Petrologica Sinica* 29, 769-780.



- Li, Y.G., Zhai, M.G., Yang, J.H., Miao, L.C., Guan, H., 2004. Gold mineralization age of the Anjiayingzi gold deposit in Chifeng County, Inner Mongolia and implications for Mesozoic metallogenic explosion in North China. *Science in China Series D: Earth Sciences* 47, 115-121.
- Liang, C., Liu, Y., Neubauer, F., Jin, W., Zeng, Z., Genser, J., Li, W., Li, W., Han, G., Wen, Q., Zhao, Y., Cai, L., 2015. Structural characteristics and LA-ICP-MS U-Pb zircon geochronology of the deformed granitic rocks from the Mesozoic Xingcheng-Taili ductile shear zone in the North China Craton. *Tectonophysics* 650, 80-103.
- Lin, Y., Zhang, C., Li, C., Deng, H., 2020. From dextral contraction to sinistral extension of intracontinental transform structures in the Yanshan and northern Taihang Mountain belts during Early Cretaceous: Implications to the destruction of the North China Craton. *Journal of Asian Earth Sciences* 189, 104139.
- Liu, C., Deng, J.F., Su, S.G., Xiao, Q.H., Luo, Z.H., Wang, Q.H., Xu, L.Q., 2004. Zircon SHRIMP dating of Yunmengshan gneissic granite and its geological significance. *Acta Petrologica et Mineralogica* 23, 141-146.
- Liu, J., Zhao, Y., Liu, X.M., 2006. Age of the Tiaojishan Formation volcanics in the Chengde Basin, northern Hebei province. *Acta Petrologica Sinica* 22, 2617-2630.
- Liu, J.L., Ji, M., Shen, L., Guan, H.M., Davis, G.A., 2011. Early Cretaceous extensional structures in the Liaodong Peninsula: Structural associations, geochronological constraints and regional tectonic implications. *Science China: Earth Sciences* 54, 823-842.
- Liu, Y., Ni, Z.Y., Zhai, M.G., Shi, Y.R.G.H., Lu, J.S., 2010. Zircon SHRIMP U-Pb dating of granite in Chicheng county, northern Hebei province and its geological implications. *Journal of Mineralogy and Petrology* 30, 38-44.
- Liu, Y.Q., Li, P.X., Tian, S.G., 2003. SHRIMP U-Pb zircon age of late Mesozoic tuff (lava) in Luanping basin, northern Hebei, and its implications. *Acta Petrologica et Mineralogica* 22, 237-244.
- Liu, Y., Liu, Y., Ji, S.A., Yang, Z., 2006. U-Pb zircon age for the Daohugou Biota at Ningcheng of Inner Mongolia and comments on related issues. *Chinese Science Bulletin* 51, 2634-2644.
- Liu, Y.Q., Kuang, H.W., Jiang, X.J., Peng, N., Xu, H., Sun, H.Y., 2012. Timing of the earliest known feathered dinosaurs and transitional pterosaurs older than the Jehol Biota. *Palaeogeography, Palaeoclimatology, Palaeoecology* 323-325, 1-12.
- Liu, Y.S., Gao, S., Kelemen, P.B., Xu, W.L., 2008. Recycled crust controls contrasting source compositions of Mesozoic and Cenozoic basalts in the North China Craton. *Geochimica et Cosmochimica Acta* 72, 2349-2376.
- Luo, Z.K., Miao, L.C., Guan, K., Qiu, Y.S., 2001. SHRIMP U-Pb zircon age of magmatic rock in Paishanlou gold mine district, Fuxin, Liaoning province, China. *Geochimica* 30, 483-490.

- Ma, Q., Zheng, J.P., 2009. In-situ U-Pb dating and Hf isotopic analyses of zircons in the volcanic rock of the Lanqi Formation in the Beipiao area, western Liaoning Province. *Acta Petrologica Sinica* 25, 3287-3297.
- Ma, Q., Zheng, J.P., Xu, Y.G., Griffin, W.L., Zhang, R.S., 2015. Are continental “adakites” derived from thickened or foundered lower crust? *Earth and Planetary Science Letters* 419, 125-133.
- Ma, Q., Xu, Y.G., Zheng, J.P., Griffin, W.L., Hong, L.B., Ma, L., 2016. Coexisting Early Cretaceous High-Mg Andesites and Adakitic Rocks in the North China Craton: the Role of Water in Intraplate Magmatism and Cratonic Destruction. *Journal of Petrology* 57, 1279 -1308.
- Mao, D.B., Chen, Z.H., Zhong, C.T., Zou, Y.C., Shi, S., Hu, X.D., 2003. Studies on the geochronology and geochemical characteristics of Mesozoic intrusions in Beichagoumen area, northern Hebei province. *Acta Petrologica Sinica* 19, 661-674.
- Meng, F.X., Gao, S., Liu, X.M., 2008. U-Pb zircon geochronology and geochemistry of volcanic rocks of the Yixian Formation in the Lingyuan area, western Liaoning, China. *Geological Bulletin of China* 27, 364-373.
- Meng, E., Liu, F.L., Shi, J.R., Cai, J., 2013. Zircon U-Pb chronology, geochemistry of the previously "Pre-Sinian" intrusive rocks in Dandong area of southeastern Liaoning Province, and its tectonic implications. *Acta Petrologica Sinica* 29, 421-436.
- Meng, F., Gao, S., Song, Z., Niu, Y., Li, X., 2018. Mesozoic high-Mg andesites from the Daohugou area, Inner Mongolia: Upper-crustal fractional crystallization of parental melt derived from metasomatized lithospheric mantle wedge. *Lithos* 302-303, 535-548
- Miao, L.C., Zhang, F.Q., Liu, D.Y., Shi, Y.R., Xie, H.Q., 2010. Zircon SHRIMP U-Pb dating for gabbro at Chaotiehe in the Haicheng area, eastern Liaoning. *Chinese Science Bulletin* 55, 403-410.
- Niu, B., He, Z., Song, B., Ren, J. & Xiao, L. (2004). SHRIMP geochronology of volcanics of the Zhangjiakou and Yixian Formations, northern Hebei Province, with a discussion on the age of the Xing'anling Group of the Great Hinggan Mountains and volcanic strata of the southeastern coastal area of China. *Acta Geologica Sinica - English Edition* 78, 1214-1228.
- Niu, X., Chen, B., Ma, X., 2011. Petrogenesis of the Dengzhazi A-type pluton from the Taihang-Yanshan Mesozoic orogenic belts, North China Craton. *Journal of Asian Earth Sciences* 41, 133-146.
- Pang, C.J., Wang, X.C., Xu, Y.G., Wen, S.N., Kuang, Y.S., Hong, L.B., 2015. Pyroxenite-derived Early Cretaceous lavas in the Liaodong Peninsula: Implication for metasomatism and thinning of the lithospheric mantle beneath North China Craton. *Lithos* 227, 77-93.
- Pei, F.P., Xu, W.L., Yang, D.B., Yu, Y., Meng, N., 2009. Heterogeneity of late Mesozoic deep lithosphere beneath the northeastern North China Craton: Evidence from elemental and Sr-Nd isotopic geochemistry of Mesozoic volcanic rocks in the southern Jilin Province, China. *Acta Petrologica*

- Sinica 25, 1962-1974.
- Pei, F.P., Xu, W.L., Yang, D.B., Yu, Y., Meng, E., Zhao, Q.G., 2011. Petrogenesis of late Mesozoic granitoids in southern Jilin province, northeastern China: Geochronological, geochemical, and Sr-Nd-Pb isotopic evidence. *Lithos* 125(1-2), 27-39.
- Qi, G.W., Zhang, J.J., Wang, M., 2015. Mesozoic tectonic setting of rift basins in eastern North China and implications for destruction of the North China Craton. *Journal of Asian Earth Sciences* 111, 414-427.
- Shen, L., Liu, J.L., Hu, L., Guan, H.M., Davis, G.A., 2011. The Dayingzi detachment fault system in Liaodong Peninsula and its regional tectonic significance. *Science China: Earth Sciences* 54, 1469-1483.
- Shi, Y., Zhao, X., Ma, Y., Hu, D., Liu, Q., Wu, Z., Zhao, Y., Liu, D., 2009. Late Jurassic-Early Cretaceous plutonism in the northern part of the Precambrian North China Craton: SHRIMP Zircon U-Pb dating of diorites and granites from the Yunmengshan Geopark, Beijing. *Acta Geologica Sinica (English edition)* 83, 310-320.
- Su, S.G., Niu, Y.L., Deng, J.F., Liu, C., Zhao, G.C., Zhao, X.G., 2007. Petrology and geochronology of Xuejiashiliang igneous complex and their genetic link to the lithospheric thinning during the Yanshanian orogenesis in eastern China. *Lithos* 96, 90-107.
- Sui, Z.M., Chen, Y.J., 2012. Petrogenesis of volcanic rocks from Sankeyushu Formation in southern Jilin: Evidences from zircon U-Pb ages and Hf isotopes. *Geoscience* 26, 627-634.
- Sun, J.F., Yang, J.H., Wu, F.Y., Li, X.H., Yang, Y.H., Xie, L.W., Wilde, S.A., 2010. Magma mixing controlling the origin of the Early Cretaceous Fangshan granitic pluton, North China Craton: In situ U-Pb age and Sr-, Nd-, Hf- and O-isotope evidence. *Lithos* 120, 421-438.
- Swisher, C.C., Wang, Y., Wang, X., Xu, X., Wang, Y., 1999. Cretaceous age for the feathered dinosaurs of Liaoning, China. *Nature* 400, 58-61.
- Swisher, C.C., Wang, X., Zhou, Z., Wang, Y., Jin, F., Zhang, J., Xu, X., Zhang, F., Wang, Y., 2002. Further support for a Cretaceous age for the feathered-dinosaur beds of Liaoning, China: New  $^{40}\text{Ar}/^{39}\text{Ar}$  dating of the Yixian and Tuchengzi Formations. *Chinese Science Bulletin* 47, 136-139.
- Wang, L.L., Hu, D.Y., Zhang, L.J., Zheng, S.L., He, H.Y., Deng, C.L., Wang, X.L., Zhou, Z.H., Zhu, R.X., 2013. SIMS U-Pb zircon age of Jurassic sediments in Linglongta, Jianchang, western Liaoning: constraint on the age of oldest feathered dinosaurs. *Chinese Science Bulletin* 58, 1346-1353.
- Wang, X.R., Gao, S., Liu, X.M., Yuan, H.L., Hu, Z.C., Zhang, H., Wang, X.C., 2006. Geochemistry of high-Mg andesites from the early Cretaceous Yixian Formation, western Liaoning: Implications for lower crustal delamination and Sr/Y variations. *Science in China Series D - Earth Sciences* 49,



904-914.

- Wu, F.Y., Yang, J.H., Wilde, S.A., Zhang, X.O., 2005a. Geochronology, petrogenesis and tectonic implications of Jurassic granites in the Liaodong Peninsula, NE China. *Chemical Geology* 221, 127-156.
- Wu, F.Y., Lin, J.Q., Wilde, S.A., Zhang, X.O., Yang, J.H., 2005b. Nature and significance of the Early Cretaceous giant igneous event in eastern China. *Earth and Planetary Science Letters* 233, 103-119.
- Wu, F.Y., Yang, J.H., Liu, X.M., 2005C. Geochronological framework of the Mesozoic granitic magmatism in the Liaodong Peninsula, Northeast China. *Geological Journal of China Universities* 11, 305-317.
- Wu, F.Y., Yang, J.H., Zhang, Y.B., Liu, X.M., 2006. Emplacement ages of the Mesozoic granites in southeastern part of the Western Liaoning Province. *Acta Petrologica Sinica* 22, 315-325.
- Wu, F.Y., Han, R.H., Yang, J.H., Wilde, S.A., Zhai, M.G., Park, S.C., 2007. Initial constraints on the timing of granitic magmatism in North Korea using U-Pb zircon geochronology. *Chemical Geology* 238, 232-248.
- Xiao, G.Q., Gao, S., Huang, H., Xie, S.W., Zhang, H., 2008. Zircon U-Pb Geochronology and Geochemistry of Mesozoic Volcanic Rocks from Dasijiazhi Area at Zhangwu, West Liaoning Province. *Earth Science - Journal of China University of Geosciences* 33, 151-164.
- Xu, H., Song, Y., Ye, K., Zhang, J., Wang, H., 2012. Petrogenesis of mafic dykes and high-Mg adakitic enclaves in the Late Mesozoic Fangshan low-Mg adakitic pluton, North China Craton. *Journal of Asian Earth Sciences* 54-55, 143-161.
- Xu, W.L., Yang, D.B., Pei, F.P., Ji, W.Q., 2005. Chronology of Qianrentun amphibolite in eastern Liaoning: Evidence from SHRIMP zircon U-Pb dating. *Acta Petrologica et Mineralogica* 24, 273-278.
- Yang, F., Santosh, M., Kim, S.W., Zhou, H., Jeong, Y.J., 2019. Late Mesozoic intraplate rhyolitic volcanism in the North China Craton: Far-field effect of the westward subduction of the Paleo-Pacific Plate. *GSA Bulletin* 132(1-2), 291-309
- Yang, J.H., Wu, F.Y., Chung, S.L., Wilde, S.A., Chu, M.F., 2004. Multiple sources for the origin of granites: Geochemical and Nd/Sr isotopic evidence from the Gudaoling granite and its mafic enclaves, northeast China. *Geochimica et Cosmochimica Acta* 68, 4469-4483.
- Yang, J. H., Wu, F. Y., Shao, J. A., Xie, L. W., Liu, X. M., 2006a. In-situ U-Pb dating and Hf isotopic analyses of zircons from volcanic rocks of the Houcheng and Zhangjiakou Formations in the Zhang-Xuan area, Northeast China. *Earth Science - Journal of China University of Geosciences* 31, 71-80.

- Yang, J.H., Wu, F.Y., Chung, S.L., Wilde, S.A., Chu, M.F., 2006b. A hybrid origin for the Qianshan A-type granite, northeast China: Geochemical and Sr-Nd-Hf isotopic evidence. *Lithos* 89, 89-106.
- Yang, J.H., Wu, F.Y., Liu, X.M., Xie, L.W., Yang, Y.H., 2007a. Petrogenesis and geological significance of the Jurassic Xiaoheshan pluton in the Liaodong Peninsula, east China: in-situ zircon U-Pb dating and Hf isotopic analysis. *Bulletin of Mineralogy, Petrology and Geochemistry* 26, 29-43.
- Yang, J.H., Wu, F.Y., Wilde, S.A., Xie, L.W., Yang, Y.H., Liu, X.M., 2007b. Tracing magma mixing in granite genesis: in situ U-Pb dating and Hf-isotope analysis of zircons. *Contributions to Mineralogy and Petrology* 153, 177-190.
- Yang, J.H., Wu, F.Y., Wilde, S.A., Chen, F., Liu, X.M., Xie, L.W., 2008a. Petrogenesis of an Alkali Syenite-Granite-Rhyolite Suite in the Yanshan Fold and Thrust Belt, Eastern North China Craton: Geochronological, Geochemical and Nd-Sr-Hf Isotopic Evidence for Lithospheric Thinning. *Journal of Petrology* 49, 315-352.
- Yang, J.H., Wu, F.Y., Wilde, S.A., Belousova, E., Griffin, W.L., 2008b. Mesozoic decratonization of the North China block. *Geology* 36, 467-470.
- Yang, W., Li, S.G., 2008. Geochronology and geochemistry of the Mesozoic volcanic rocks in Western Liaoning: Implications for lithospheric thinning of the North China Craton. *Lithos* 102, 88-117.
- Yang, W., Li, S.G., Jiang, B.Y., 2007. New evidence for Cretaceous age of the feathered dinosaurs of Liaoning: zircon U-Pb SHRIMP dating of the Yixian Formation in Sihetun, northeast China. *Cretaceous Research* 28, 177-182.
- Yuan, H.L., Liu, X.M., Liu, Y.S., Gao, S., Ling, W.L., 2006. Geochemistry and U-Pb zircon geochronology of Late-Mesozoic lavas from Xishan, Beijing. *Science in China: Series D Earth Sciences* 49, 50-67.
- Zhao, Y., Zhang, S.H., Xu, G., Yang, Z.Y., Hu, J.M., 2004. The Jurassic major tectonic events of the Yanshannian intraplate deformation belt. *Geological Bulletin of China* 23, 854-863.
- Zhang, H., Yuan, H.L., Hu, Z.C., Liu, X.M., Diwu, C.R., 2005a. U-Pb zircon dating of the Mesozoic volcanic strata in Luanping of North Hebei and its significance. *Earth Science - Journal of China University of Geosciences* 30, 707-720.
- Zhang, H., Liu, X.M., Zhang, Y.Q., Yuan, H.L., Hu, Z.C., 2005b. Zircon U-Pb ages and significance of bottom and top beds of Zhangjiakou formation in Liaoning and Hebei Provinces. *Earth Science - Journal of China University of Geosciences* 30, 387-401.
- Zhang, H., Liu, X.M., Gao, S., Zhang, L.J., Li, Z.T., Yang, F.L., Wang, X.C., 2005c. Redefinition of the Zhangjiakou formation in Lingyuan, western Liaoning and its significance - constraints from Laser ICP-MS zircon U-Pb ages. *Geological Bulletin of China* 24, 110-117.
- Zhang, H., Liu, X.M., Yuan, H.L., Hu, Z.C., Diwu, C.R., 2006. U-Pb isotopic age of the lower Yixian

- Formation in Lingyuan of western Liaoning and its significance. *Geological Review* 52, 63-71.
- Zhang, H., Wang, M.X., Liu, X.M., 2008a. Constraints on the upper boundary age of the Tiaojishan Formation volcanic rocks in West Liaoning-North Hebei by LA-ICP-MS dating. *Chinese Science Bulletin* 53, 3574-3584.
- Zhang, H., Wang, M.X., Liu, X.M., 2008b. LA-ICP-MS dating of Zhangjiakou Formation volcanic rocks in the Zhangjiakou region and its geological significance. *Progress in Natural Science* 18, 975-981.
- Zhang, H.F., Sun, M., Zhou, X.H., Zhou, M.F., Fan, W.M., Zheng, J.P., 2003. Secular evolution of the lithosphere beneath the eastern North China Craton: Evidence from Mesozoic basalts and high-Mg andesites. *Geochimica et Cosmochimica Acta* 67, 4373-4387.
- Zhang, S.H., Zhao, Y., Davis, G.A., Ye, H., Wu, F., 2014. Temporal and spatial variations of Mesozoic magmatism and deformation in the North China Craton: Implications for lithospheric thinning and decratonization. *Earth-Science Reviews* 131, 49-87.
- Zhang, X., Yuan, L., Wilde, S.A., 2014. Crust/mantle interaction during the construction of an extensional magmatic dome: Middle to Late Jurassic plutonic complex from western Liaoning, North China Craton. *Lithos* 205, 185-207.
- Zhang, X.M., Xu, W.L., Sun, C.Y., Wang, F., Yang, D.B., 2019. Geochronology and geochemistry of early Mesozoic magmatism in the northeastern North China Craton: Implications for tectonic evolution. *Gondwana Research* 67, 33-45.
- Gao, H., 2018, The early Mesozoic chronostratigraphic framework of the Yanshan fold-thrust belt, North China and its implications: A Dissertation Submitted to China University of Geosciences for the Doctor Degree of Geology.
- Ge, W., Wu, F., Zhou, C., and Zhang, J., 2007, Porphyry Cu-Mo deposits in the eastern Xing'an-Mongolian Orogenic Belt: mineralization ages and their geodynamic implications: *Chinese Science Bulletin*, v. 052, no. 24, p. 3416-3427.
- Gong, M., Cai, J., Yan, G., Liu, C., and Liu, Z., 2019, Petrogeochemical characteristics and zircon SH R IMP U-Pb ages of the alkaline intrusions on northern side of the Yinshan Mountains-Yanshan Mountains and their tectonic significances: *Geological Review*, v. 65, no. 4.
- Hao, W., Zhu, R., and Zhu, G., 2020, Jurassic tectonics of the eastern North China Craton: Response to initial subduction of the Paleo-Pacific Plate: *GSA Bulletin*, v. 133, no. 1-2, p. 19-36.
- Lin, S., Zhu, G., Yan, L., Song, L., and Liu, B., 2013, Structural and chronological constraints on a Late Paleozoic shortening event in the Yanshan Tectonic Belt: *Chinese Science Bulletin*, v. 58, no. 34, p. 3922-3936.

- Lin, S., Zhu, G., Zhao, T., Song, L., and Liu, B., 2015, Tectonic setting of Late Paleozoic-Mesozoic magmatic activities in the Kalaqin area of the northern Yanshan tectonic belt: *Chinese Journal of Geology*, v. 50, no. 1, p. 30-49.
- Wu, F., Sun, D., Ge, W., Zhang, Y., Grant, M. L., Wilde, S. A., and Jahn, B., 2011, Geochronology of the Phanerozoic granitoids in northeastern China: *Journal of Asian Earth Sciences*, v. 41, no. 1, p. 1-30.
- Wu, F., Sun, D., Li, H., Jahn, B., and Wilde, S. A., 2002, A-type granites in northeastern China: age and geochemical constraints on their petrogenesis: *Chemical Geology*, v. 187, no. 1-2, p. 143-173.
- Wu, F., Wilde, S. A., Zhang, G., and Sun, D., 2004, Geochronology and petrogenesis of the post-orogenic Cu-Ni sulfide-bearing mafic-ultramafic complexes in Jilin Province, NE China: *Journal of Asian Earth Sciences*, v. 23, no. 5, p. 781-797.
- Xu, W., Pei, F., Gao, F., Yang, D., and Bu, Y., 2008, Zircon U-Pb Age from Basement Granites in Yishu Graben and Its Tectonic Implications: *Earth Science-Journal of China University of Geosciences*, v. 33, no. 2.
- Zhang, L., Han, B., Zhu, Y., Xu, Z., Chen, J., and Song, B., 2009, Geochronology, mineralogy, crystallization process and tectonic implications of the Shuangyashan monzogabbro in eastern Heilongjiang Province: *Acta Petrologica Sinica*, v. 25, no. 3, p. 577-587.
- Zhang, X., Su, W., and Wang, H., 2005, Zircon SHRIMP geochronology of the Faku tectonites in the northern Liaoning Province: implications for the northern boundary of the North China Craton: *Acta Petrologica Sinica*, v. 21, no. 1, p. 135-142.

#### **Part 4: References related to Precambrian zircon U-Pb ages from the North China Craton**

- Cai, J., Yan, G., Mu, B., Xu, B., Shao, H., and Xu, R., 2002, U-Pb and Sm-Nd isotopic ages of an alkaline syenite complex body in Liangtun-Kuangdongguo, Gai County, Liaoning Province, China and their geological significance: *Acta Petrologica Sinica*, v. 18, no. 3.
- Chu, H., Wang, H., Wei, C., Liu, H., and Zhang, K., 2012, The Metamorphic Evolution History of High Pressure Granulites in Chengde Area, Northern Margin of North China: Zircon Chronology and Geochemical Evidence: *Acta Geoscientica Sinica*, v. 33, no. 6, p. 977-987.
- Duan, Z., Wei, C., and Li, Z., 2019, Metamorphic P-T paths and zircon u-pb ages of Paleoproterozoic metabasic dykes in eastern Hebei and northern Liaoning: Implications for the tectonic evolution of the North China Craton: *Precambrian Research*, v. 326, p. 124-141.
- Duan, Z., Wei, C., and Qian, J., 2015, Metamorphic P-T paths and Zircon U-Pb age data for the Paleoproterozoic metabasic dykes of high-pressure granulite facies from Eastern Hebei, North China Craton: *Precambrian Research*, v. 271, p. 295-310.

- Gao, L., Zhang, C., Liu, P., Ding, X., Wang, Z., and Zhang, Y., 2009, Recognition of Meso-and Neoproterozoic stratigraphic framework in north and south China: *Acta Geologica Sinica*, v. 30, no. 4.
- Gao, L., Zhang, C., Yin, C., Shi, X., Wang, Z., Liu, Y., Liu, P., Tang, F., and Song, B., 2008, SHRIMP zircon ages: Basis for refining the Chronostratigraphic classification of the Meso-and Neoproterozoic strata in north China old land: *Acta Geoscientica Sinica*, v. 29, no. 3, p. 366-376.
- Grant, M. L., Wilde, S. A., Wu, F., and Yang, J., 2009, The application of zircon cathodoluminescence imaging, Th-U-Pb chemistry and U-Pb ages in interpreting discrete magmatic and high-grade metamorphic events in the North China Craton at the Archean/Proterozoic boundary: *Chemical Geology*, v. 261, no. 1, p. 155-171.
- Guo, J. H., Sun, M., Chen, F. K., and Zhai, M. G., 2005, Sm-Nd and SHRIMP U-Pb zircon geochronology of high-pressure granulites in the Sanggan area, North China Craton: timing of Paleoproterozoic continental collision: *Journal of Asian Earth Sciences*, v. 24, no. 5, p. 629-642.
- Han, S., Wu, C., Zhou, Z., and Wang, G., 2020, Geology, geochemistry, and geochronology of the paleoproterozoic Donggouzi mafic-ultramafic complex: Implications for the evolution of the North China craton: *Lithos*, v. 366-367, p. 105567.
- He, Z., Zhang, X., Niu, B., Liu, R., and Zhao, L., 2011, The paleo-weathering mantle of the Proterozoic rapakivi granite in Miyun County Beijing and the relationship with the Changzhougou Formation of Changchengian System: *Earth Science Frontiers (China University of Geosciences, Beijing; Peking University)*, v. 18, no. 4, p. 123-130.
- Jiang, N., Guo, J., Zhai, M., and Zhang, S., 2010, ~2.7Ga crust growth in the North China craton: *Precambrian Research*, v. 179, no. 1, p. 37-49.
- Li, H., Su, W., Zhou, H., Geng, J., Xiang, Z., Cui, Y., Liu, W., and Lu, S., 2011, The base age of the Changchengian System at the northern North China Craton should be younger than 1670 Ma: Constraints from zircon U-Pb LA-MC-ICPMS dating of a granite-porphyry dike in Miyun County, Beijing: *Earth Science Frontiers (China University of Geosciences, Beijing; Peking University)*, v. 18, no. 3, p. 108-120.
- Liu, D., Wang, X., Zhang, H., and Shi, C., 2019, Zircon SHRIMP U-Pb age of the Chuanlinggou Formation of the Changcheng Group, north China and the stratigraphic implications: *Earth Science Frontiers (China University of Geosciences, Beijing; Peking University)*, v. 26, no. 3, p. 183-189.
- Liu, H., and Zhang, H.-F., 2021, Chicheng high-pressure granulites record the paleoproterozoic tectonic evolution in the northern North China Craton: *Precambrian Research*, v. 359, p. 106213.
- Liu, J., Zhang, J., Liu, Z., Yin, C., Zhao, C., Li, Z., Yang, Z., and Dou, S., 2018, Geochemical and



- geochronological study on the Paleoproterozoic rock assemblage of the Xiuyan region: New constraints on an integrated rift-and-collision tectonic process involving the evolution of the Jiao-Liao-Ji Belt, North China Craton: *Precambrian Research*, v. 310, p. 179-197.
- Liu, S., Lv, Y., Feng, Y., Liu, X., Yan, Q., Zhang, C., and Tian, W., 2007a, Zircon and monazite geochronology of the Hongqiyingsi complex, northern Hebei, China: *Geological Bulletin of China*, v. 26, no. 9, p. 1086-1100.
- Liu, S., Lv, Y., Feng, Y., Zhang, C., Tian, W., Yan, Q., and Liu, X., 2007b, Geology and Zircon U-Pb Isotopic Chronology of Dantazi Complex, Northern Hebei Province: *Geological Journal of China Universities*, v. 13, no. 3, p. 484-497.
- Liu, S., Santosh, M., Wang, W., Bai, X., and Yang, P., 2011, Zircon U-Pb chronology of the Jianping Complex: Implications for the Precambrian crustal evolution history of the northern margin of North China Craton: *Gondwana Research*, v. 20, no. 1, p. 48-63.
- Liu, S., Wang, W., Bai, X., Zhang, F., and Yang, P., 2010, Geological events of Early Precambrian complex in north Chaoyang area, Liaoning Province: *Acta Petrologica Sinica*, v. 26, no. 7, p. 1993-2004.
- Lu, H., and Wei, C., 2020, Late Neoproterozoic or late Paleoproterozoic high-pressure granulite facies metamorphism from the East Hebei terrane, North China Craton?: *Journal of Asian Earth Sciences*, v. 190, p. 104195.
- Qu, J., Li, J., and Liu, J., 2012, Geochronological study on the Fenghuangzui complex of Dantazi Group at northern Hebei Province: *Acta Petrologica Sinica*, v. 28, no. 9, p. 2879-2889.
- Tian, H., Li, H., Zhang, J., Su, W., Liu, H., Xiang, Z., and Zhong, Y., 2020, SHRIMP U-Pb dating for zircons from the tuff bed of the Mesoproterozoic Gaoyuzhuang Formation in Jixian Section, Tianjin, and its constraints on the Mesoproterozoic bio-environmental events: *Geological Survey and Research*, v. 43, no. 2.
- Tian, H., Zhang, J., Li, H., Su, W., Zhou, H., Yang, L., Xiang, Z., Geng, J., Liu, H., Zhu, S., and Xu, Z., 2015, Zircon LA-MC-ICPMS U-Pb Dating of Tuff from Mesoproterozoic Gaoyuzhuang Formation in Jixian County of North China and Its Geological Significance: *Acta Geoscientia Sinica*, v. 36, no. 5, p. 647-658.
- Wan, Y., Song, B., Yang, C., and Liu, D., 2005, Zircon SHRIMP U-Pb Geochronology of Archean Rocks from the Fushun—Qingyuan Area, Liaoning Province and Its Geological Significance: *Acta Geologica Sinica*, v. 79, no. 1.
- Wang, C., Cui, W., and KrEder, A., 1999, Zircon evaporation ages and their geological significance from granitoid of the Jianping metamorphic complex, western Liaoning province.: *Acta Scientiarum Naturalium Universitatis Pekinensis*, v. 35, no. 4.

- Wang, F., Peng, P., Chen, C., Hu, H., Huang, D., Chen, F., and Zhai, M., 2021, Petrogenesis and geological significance of the Paleoproterozoic Dushikou metagabbro-diorite in northern Hebei Province: *Acta Petrologica Sinica*, v. 37, no. 1, p. 269-283.
- Wang, W., Liu, S., Bai, X., Li, Q., Yang, P., Zhao, Y., Zhang, S., and Guo, R., 2013, Geochemistry and zircon U–Pb–Hf isotopes of the late Paleoproterozoic Jianping diorite–monzonite–syenite suite of the North China Craton: Implications for petrogenesis and geodynamic setting: *Lithos*, v. 162-163, p. 175-194.
- Wang, W., Liu, S., Bai, X., Yang, P., Li, Q., and Zhang, L., 2011, Geochemistry and zircon U–Pb–Hf isotopic systematics of the Neoarchean Yixian–Fuxin greenstone belt, northern margin of the North China Craton: Implications for petrogenesis and tectonic setting: *Gondwana Research*, v. 20, no. 1, p. 64-81.
- Wang, W., Liu, S., Santosh, M., Deng, Z., Guo, B., Zhao, Y., Zhang, S., Yang, P., Bai, X., and Guo, R., 2015, Late Paleoproterozoic geodynamics of the North China Craton: Geochemical and zircon U–Pb–Hf records from a volcanic suite in the Yanliao rift: *Gondwana Research*, v. 27, no. 1, p. 300-325.
- Wu, F., Yang, J., Zhang, Y., and Liu, X., 2006, Emplacement ages of the Mesozoic granites in southeastern part of the western Liaoning province: *Acta Petrologica Sinica*, v. 22, no. 2, p. 315-325.
- Yan, D., Zhou, M., Song, H., Liu, D., Wang, Y., Wang, C., and Dong, T., 2005, A geochronological constraint to the Guandi complex, West Hills of Beijing, and its implications for the tectonic evolution Earth Science Frontiers (China University of Geosciences, Beijing; Peking University), v. 12, no. 2.
- Zhang, D., O'Brien, P. J., Schertl, H.-P., Ma, X., Tian, Z., Zhao, L., and Guo, J., 2021, Metamorphic and geochronological evolution of Paleoproterozoic high-pressure ultra-high-temperature pelitic granulite, Chicheng, northern Trans-North China Orogen: *Precambrian Research*, v. 361, p. 106237.
- Zhang, H. C. G., Zhao, G., Wang, C., Yao, J., and Xu, N., 2022, Phase equilibria modelling and zircon U–Pb geochronology of Paleoproterozoic mafic granulites from the Chengde Complex, North China Craton: *Precambrian Research*, v. 371, p. 106576.
- Zhang, S., Zhao, Y., Song, B., and Wu, H., 2004, The late Paleozoic gneissic granodiorite pluton in early Pre-cambrian high-grade metamorphic terrains near Longhua county in northern Hebei province, north China: result from zircon SHRIMP U–Pb dating and its tectonic implications: *Acta Petrologica Sinica*, v. 20, no. 3, p. 621-626.
- Zhang, S., Zhao, Y., Ye, H., Hu, J., and Wu, F., 2013, New constraints on ages of the Chuanlinggou and

Tuanshanzi formations of the Changcheng System in the Yan-Liao area in the northern North China Craton: *Acta Petrologica Sinica*, v. 29, no. 7, p. 2481-2490.

Zheng, J., Lu, F., Yu, C., and Tang, H., 2004, Zircon Hf isotope, U-Pb and trace element analysis on granulite xenoliths in Hannuoba basalt: A Record of Early Evolution of the Lower Crust in North China: *Chinese Science Bulletin*, v. 49, no. 4.

## **Part 5: References related to the Precambrian zircon U-Pb ages from the Liao-Ji Region**

Cai, J., Yan, G., Mu, B., Xu, B., Shao, H., & Xu, R. (2002). U-Pb and Sm-Nd isotopic ages of an alkaline syenite complex body in Liangtun-Kuangdongguo, Gai County, Liaoning Province, China and their geological significance. *Acta Petrologica Sinica*, 18(3).

Grant, M. L., Wilde, S. A., Wu, F., & Yang, J. (2009). The application of zircon cathodoluminescence imaging, Th-U-Pb chemistry and U-Pb ages in interpreting discrete magmatic and high-grade metamorphic events in the North China Craton at the Archean/Proterozoic boundary. *Chemical Geology*, 261(1), 155-171.

Hu, G., Wang, M., Zhang, S.-H., Zhao, Y., & Zhang, Q.-Q. (2022). A ca. 1.33 Ga mafic dyke identified from the Liaodong Peninsula, northeastern North China Craton: Implications for eastward extension of the Yanliao large igneous province. *Precambrian Research*, 378, 106770.

Li, S., & Zhao, G. (2007). SHRIMP U-Pb zircon geochronology of the Liaoji granitoids: Constraints on the evolution of the Paleoproterozoic Jiao-Liao-Ji belt in the Eastern Block of the North China Craton. *Precambrian Research*, 158(1), 1-16.

Li, Z., & Chen, B. (2014). Geochronology and geochemistry of the Paleoproterozoic meta-basalts from the Jiao-Liao-Ji Belt, North China Craton: Implications for petrogenesis and tectonic setting. *Precambrian Research*, 255, 653-667.

Li, Z., & Chen, B. (2019). Lithotectonic elements of Archean basement on the Liaodong Peninsula and its vicinity, North China Craton, China. *Frontiers of Earth Science*, 13(1), 209-228.

Li, Z., Chen, B., & Yan, X. (2019). The Liaohe Group: An insight into the Paleoproterozoic tectonic evolution of the Jiao-Liao-Ji Belt, North China Craton. *Precambrian Research*, 326, 174-195.

Liu, F., Liu, C., Itano, K., Iizuka, T., Cai, J., & Wang, F. (2017). Geochemistry, U-Pb dating, and Lu-Hf isotopes of zircon and monazite of porphyritic granites within the Jiao-Liao-Ji orogenic belt: Implications for petrogenesis and tectonic setting. *Precambrian Research*, 300, 78-106.

Liu, F., Liu, L., Cai, J., Liu, P., Wang, F., Liu, C., & Liu, J. (2019). A widespread Paleoproterozoic partial melting event within the Jiao-Liao-Ji Belt, North China Craton: Zircon U-Pb dating of granitic leucosomes within pelitic granulites and its tectonic implications. *Precambrian Research*, 326, 155-173.

- Liu, J., Zhang, J., Yin, C., Cheng, C., Liu, X., Zhao, C., . . . Wang, X. (2020). Synchronous A-type and adakitic granitic magmatism at ca. 2.2 Ga in the Jiao–Liao–Ji belt, North China Craton: Implications for rifting triggered by lithospheric delamination. *Precambrian Research*, 342, 105629.
- Lu, X., Wu, F., Zhang, Y., Zhao, C., & Guo, C. (2004). Emplacement age and tectonic setting of the Paleoproterozoic Liaoji granites in Tonghua area, southern Jilin province. *Acta Petrologica Sinica*, 20(3), 381-392.
- Luo, Y., Sun, M., Zhao, G., Li, S., Xu, P., Ye, K., & Xia, X. (2004). LA-ICP-MS U–Pb zircon ages of the Liaohe Group in the Eastern Block of the North China Craton: constraints on the evolution of the Jiao-Liao-Ji Belt. *Precambrian Research*, 134(3), 349-371.
- Meng, E., Liu, F.-L., Liu, P.-H., Liu, C.-H., Yang, H., Wang, F., . . . Cai, J. (2014). Petrogenesis and tectonic significance of Paleoproterozoic meta-mafic rocks from central Liaodong Peninsula, northeast China: Evidence from zircon U–Pb dating and in situ Lu–Hf isotopes, and whole-rock geochemistry. *Precambrian Research*, 247, 92-109.
- Meng, E., Wang, C.-Y., Li, Y.-G., Li, Z., Yang, H., Cai, J., . . . Jin, M.-Q. (2017). Zircon U–Pb–Hf isotopic and whole-rock geochemical studies of Paleoproterozoic metasedimentary rocks in the northern segment of the Jiao–Liao–Ji Belt, China: Implications for provenance and regional tectonic evolution. *Precambrian Research*, 298, 472-489.
- Tian, Z., Liu, F., Yan, Z., Liu, P., Xu, W., Liu, L., . . . Xiao, W. (2021). Palaeoproterozoic turbidite deposition in the Liaodong Peninsula, northeastern North China craton – Constraints from the Gaojiayu formation of the Liaohe Group. *Precambrian Research*, 352, 106008.
- Wan, Y., Song, B., Yang, C., & Liu, D. (2005). Zircon SHRIMP U-Pb Geochronology of Archaean Rocks from the Fushun—Qingyuan Area, Liaoning Province and Its Geological Significance. *Acta Geologica Sinica*, 79(1).
- Wang, X., Oh, C. W., Lee, B. C., & Liu, F. (2020). Paleoproterozoic postcollisional metamorphic and igneous activities in the Jinan area of the Jiao-Liao-Ji Belt in the North China Craton and their tectonic implications. *Precambrian Research*, 346, 105793.
- Xu, W., Liu, F., Tian, Z., Liu, L., Ji, L., & Dong, Y. (2018). Source and petrogenesis of Paleoproterozoic meta-mafic rocks intruding into the North Liaohe Group: Implications for back-arc extension prior to the formation of the Jiao-Liao-Ji Belt, North China Craton. *Precambrian Research*, 307, 66-81.
- Yuan, L., Zhang, X., Xue, F., Han, C., Chen, H., & Zhai, M. (2015). Two episodes of Paleoproterozoic mafic intrusions from Liaoning province, North China Craton: Petrogenesis and tectonic implications. *Precambrian Research*, 264, 119-139.
- Zhang, H.-F., Ying, J.-F., Tang, Y.-J., Li, X.-H., Feng, C., & Santosh, M. (2011). Phanerozoic reactivation

- of the Archean North China Craton through episodic magmatism: Evidence from zircon U–Pb geochronology and Hf isotopes from the Liaodong Peninsula. *Gondwana Research*, 19(2), 446–459.
- Zhang, J., Liu, J., Yang, C., Zhang, C., Yang, H., Lu, T., . . . Zhao, L. (2020). Multi-stage Paleoproterozoic structural evolution of the southern Liaodong orogenic belt: A case study of the Hadabei granite gneiss dome. *Precambrian Research*, 342, 105691.
- Zheng, J., Chen, B., Liu, S., & Bao, C. (2022). A TRIASSIC OROGENIC GOLD MINERALIZATION EVENT IN THE PALEOPROTEROZOIC METAMORPHIC ROCKS: EVIDENCE FROM TWO TYPES OF RUTILE IN THE BAIYUN GOLD DEPOSIT, LIAODONG PENINSULA, NORTH CHINA CRATON. *Economic Geology*, 117(7), 1657–1673.

## **Part 6: References related to the Supplemental Material**

- Chew, D.M., O’Sullivan, G., Caracciolo, L., Mark, C., and Tyrrell, S., 2020, Sourcing the sand: accessory mineral fertility, analytical and other biases in detrital U-Pb provenance analysis: *Earth-Science Reviews*, v. 202, p. 103093, <https://doi.org/10.1016/j.earscirev.2020.103093>.
- O’Sullivan, G., Chew, D., Kenny, G., Henrichs, I., and Mulligan, D., 2020, The trace element composition of apatite and its application to detrital provenance studies: *Earth-Science Reviews*, v. 201, p. 103044, <https://doi.org/10.1016/j.earscirev.2019.103044>.
- O’Sullivan, G.J., Chew, D.M., Morton, A.C., Mark, C., and Henrichs, I.A., 2018, An integrated apatite geochronology and geochemistry tool for sedimentary provenance analysis: *Geochemistry, Geophysics, Geosystems*, v. 19, no.4, p. 1309–1326, <https://doi.org/10.1002/2017GC007343>.
- Vermeesch, P., 2018, IsoplotR: A free and open toolbox for geochronology: *Geoscience Frontiers*, v. 9, no. 5, p. 1479–1493, <https://doi.org/10.1016/j.gsf.2018.04.001>.
